# Supplementary material
Source: Springer Nature journal article supplement (https://www.springermedizin.de/resource/supplementary/13054_2012_648_MOESM4_ESM.pdf/9708942)

## CD4

## CD8

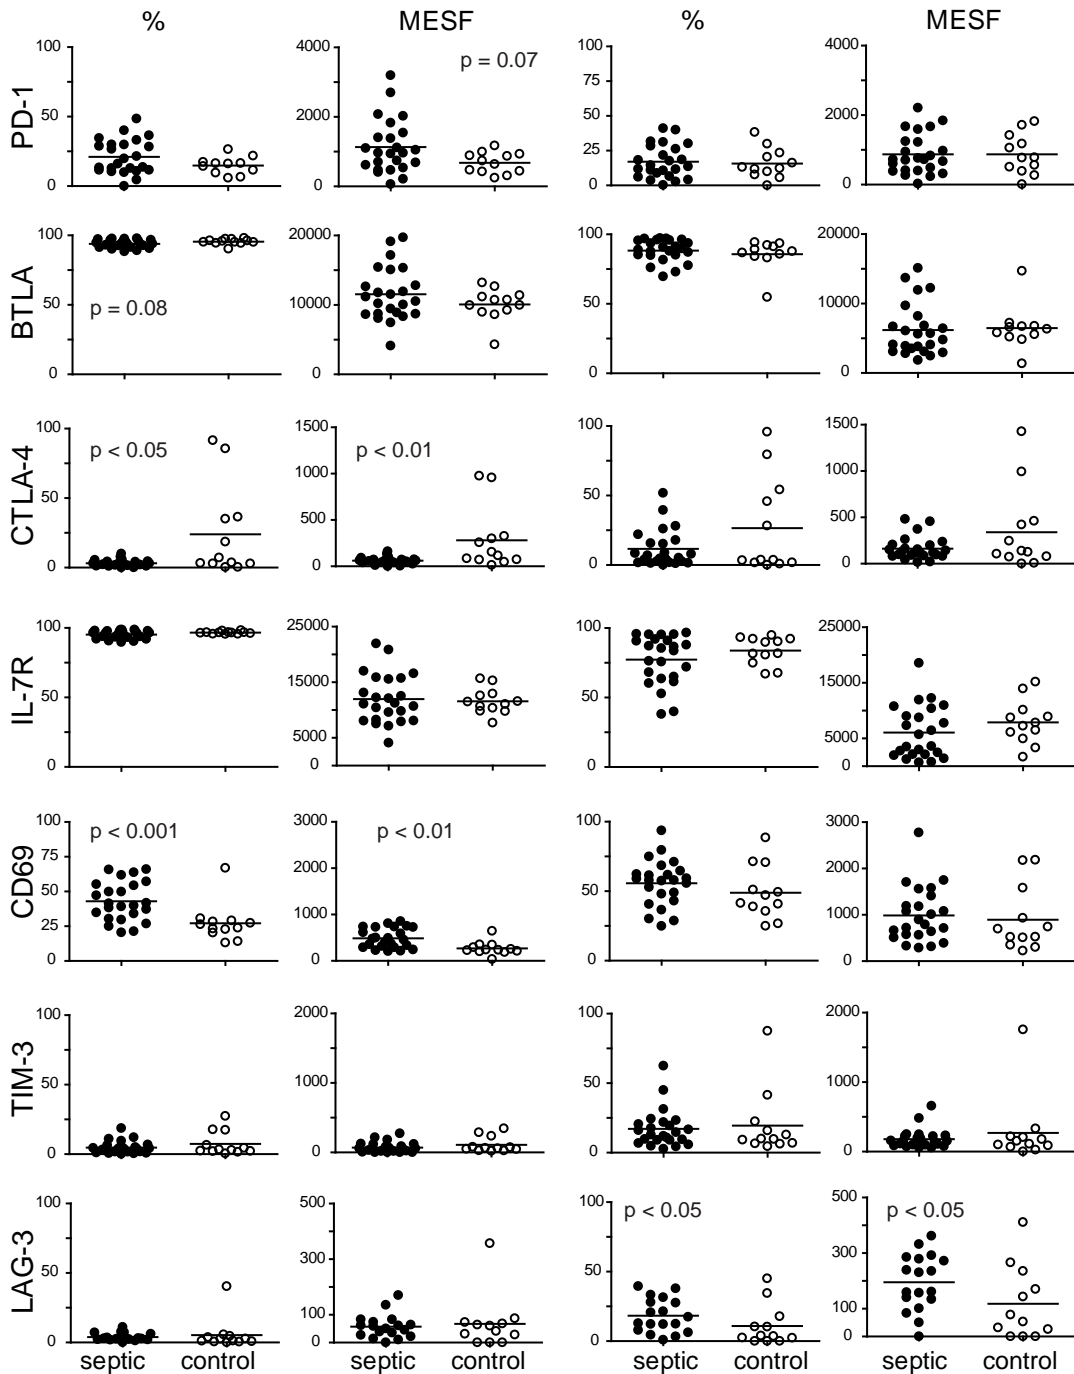

Supplement: MOESM4 [file 9708942]
